# Supplementary material for: Development and validation of a simple clinical nomogram for predicting infectious diseases in pediatric kidney transplantation recipients: a retrospective study
Source: PeerJ journal article supplement (doi:10.7717/peerj.18454), 2024-11-21
Supplement: Figures_and_data.zip [file Figures_and_data.zip]

## Sheet: Sheet1
Group/variables	sex	WBC	NEU	LYM	PLT	MO	MPV	NLR	PLR	MLR	PNR	MPVLR	EDW	MPR	ALB
infected	female	2.68	1.56	0.76	187	0.31	9.9	2.05263	246.053	0.407895	119.872	13.0263	0.13	0.0529412	32.1
infected	female	10.15	8.37	1.11	199	0.66	9.6	7.54054	179.279	0.594595	23.7754	8.64865	0.16	0.0482412	32.9
infected	female	6.7	5.23	0.93	322	0.54	9	5.62366	346.237	0.580645	61.5679	9.67742	0.15	0.0279503	34
infected	female	3.22	1.34	1.52	101	0.19	11.3	0.881579	66.4474	0.125	75.3731	7.43421	0.13	0.111881	41.1
infected	female	1.98	0.63	1.11	88	0.18	10.6	0.567568	79.2793	0.162162	139.683	9.54955	40.9	0.120455	34
infected	female	13.6	10.86	0.81	239	1.14	10.3	13.4074	295.062	1.40741	22.0074	12.716	0.14	0.0430962	40.2
infected	male	6.43	4.47	0.77	220	1.09	10.1	5.80519	285.714	1.41558	49.217	13.1169	0.14	0.0459091	42.8
infected	male	5	3.8	0.35	273	0.78	9.3	10.8571	780	2.22857	71.8421	26.5714	0.13	0.0340659	43.6
infected	female	7.93	5.59	1.41	376	0.7	8.4	3.96454	266.667	0.496454	67.263	5.95745	0.2	0.0223404	42
infected	female	4	3.19	0.28	156	0.48	7.2	11.3929	557.143	1.71429	48.9028	25.7143	38.9	0.0461538	43.8
infected	male	6.99	3.3	2	237	1.2	7.63	1.65	118.5	0.6	71.8182	3.815	0.13	0.0321941	36
infected	female	8.78	7.43	0.79	365	0.55	9.4	9.40506	462.025	0.696203	49.1252	11.8987	0.15	0.0257534	26
infected	female	12.99	10.99	1.48	259	0.49	9	7.42568	175	0.331081	23.5669	6.08108	0.13	0.034749	25.4
infected	male	7.17	3.56	3.24	270	0.25	10.5	1.09877	83.3333	0.0771605	75.8427	3.24074	0.14	0.0388889	47
infected	male	39.56	38.75	0.17	393	0.63	7.9	227.941	2311.76	3.70588	10.1419	46.4706	0.15	0.0201018	38.2
infected	female	4.22	1.9	1.9	204	0.5	9.06	1	107.368	0.263158	107.368	4.76842	0.14	0.0444118	47.4
infected	female	1.46	0.36	0.67	199	0.42	9	0.537313	297.015	0.626866	552.778	13.4328	0.12	0.0452261	40.6
infected	female	4.77	1.47	2.76	228	0.38	9.1	0.532609	82.6087	0.137681	155.102	3.2971	0.13 37.30	0.0399123	41.8
infected	female	5.54	2.54	2.5	257	0.44	7.6	1.016	102.8	0.176	101.181	3.04	0.14 34.9	0.029572	42.5
infected	male	7.57	2.53	4.57	352	0.31	8.7	0.553611	77.0241	0.0678337	139.13	1.90372	0.13 40.3	0.0247159	34.3
infected	male	13.07	10.97	1.54	350	0.53	8.8	7.12338	227.273	0.344156	31.9052	5.71429	0.12 34.5	0.0251429	37.3
infected	male	11.3	8.51	2.11	229	0.62	10	4.03318	108.531	0.293839	26.9095	4.73934	0.12 35.5	0.0436681	42.1
infected	male	2.2	0.59	1.37	222	0.13	9.1	0.430657	162.044	0.0948905	376.271	6.64234	0.12 33.1	0.040991	39.5
infected	female	2.75	0.96	1.12	266	0.65	10.7	0.857143	237.5	0.580357	277.083	9.55357	0.17 51.10	0.0402256	32
infected	female	3.59	1.57	1.77	191	0.14	10.3	0.887006	107.91	0.079096	121.656	5.81921	0.12 35.1	0.0539267	38.7
infected	female	5.65	2.58	2.56	192	0.36	10	1.00781	75	0.140625	74.4186	3.90625	0.13 40.7	0.0520833	37.3
infected	female	2.89	1.67	0.9	113	0.106	8.1	1.85556	125.556	0.117778	67.6647	9	0.16 48.30	0.0716814	21.4
infected	female	3.66	2.58	0.76	252	0.29	7.5	3.39474	331.579	0.381579	97.6744	9.86842	0.15 47.5	0.0297619	20.6
infected	female	3.37	2.54	0.57	228	0.19	7.7	4.45614	400	0.333333	89.7638	13.5088	0.13 39	0.0337719	34
infected	female	7.56	3.27	3.75	347	0.44	8.1	0.872	92.5333	0.117333	106.116	2.16	0.14 39.9	0.0233429	44
infected	female	7.17	6.18	0.88	349	0.1	7.7	7.02273	396.591	0.113636	56.4725	8.75	0.14 37	0.022063	46
infected	female	9.46	4.57	3.8	292	0.68	10.6	1.20263	76.8421	0.178947	63.895	2.78947	0.13 39.6	0.0363014	36.7
infected	female	11.39	6.51	3.62	307	0.86	10.5	1.79834	84.8066	0.237569	47.1582	2.90055	0.13 40.6	0.034202	33.5
infected	female	10.2	7.55	2.03	278	0.57	10.2	3.71921	136.946	0.280788	36.8212	5.02463	0.13 36.2	0.0366906	34.6
infected	female	16.23	14.32	1.13	251	0.76	12.6	12.6726	222.124	0.672566	17.5279	11.1504	0.13 38.7	0.0501992	34
infected	male	8.9	6.6	1.1	370	0.75	8.1	6	336.364	0.681818	56.0606	7.36364	0.17 53.2	0.0218919	30.4
infected	male	3.22	0.66	2.25	112	0.29	10	0.293333	49.7778	0.128889	169.697	4.44444	0.14 37.8	0.0892857	41
infected	male	4.87	1.5	2.82	199	0.43	9.1	0.531915	70.5674	0.152482	132.667	3.22695	0.15 35.5	0.0457286	38.2
infected	male	7.04	3.94	2.1	201	0.96	7.8	1.87619	95.7143	0.457143	51.0152	3.71429	0.16 37.20	0.038806	36
infected	female	7.05	4.68	1.7	299	0.44	8.7	2.75294	175.882	0.258824	63.8889	5.11765	0.13 42	0.029097	41.2
infected	male	3.78	2.57	0.85	281	0.21	9	3.02353	330.588	0.247059	109.339	10.5882	0.16 43.40	0.0320285	38.8
infected	male	2.78	0.99	1.26	256	0.45	10.5	0.785714	203.175	0.357143	258.586	8.33333	0.14 40.9	0.0410156	40.3
infected	female	5.64	3.13	1.46	306	0.97	9.7	2.14384	209.589	0.664384	97.7636	6.64384	0.13 38.1	0.0316993	31.8
infected	female	5.06	2.69	1.46	205	0.48	9.6	1.84247	140.411	0.328767	76.2082	6.57534	0.15 43.3	0.0468293	37
infected	female	11.18	8.88	1.26	286	0.82	8.5	7.04762	226.984	0.650794	32.2072	6.74603	0.14 39.4	0.0297203	35.7
infected	male	5.94	5.38	0.14	180	0.42	9.4	38.4286	1285.71	3	33.4572	67.1429	0.16 44.8	0.0522222	40.1
infected	female	15.31	13.48	1.25	312	0.49	8.5	10.784	249.6	0.392	23.1454	6.8	0.15 41.4	0.0272436	46
infected	male	2.45	0.81	1.23	257	0.14	8.5	0.658537	208.943	0.113821	317.284	6.91057	0.13 33.9	0.0330739	42.1
infected	male	9.24	6.82	0.91	293	0.48	8	7.49451	321.978	0.527473	42.9619	8.79121	0.14 39.2	0.0273038	37.1
infected	female	8.7	4.81	3.22	256	0.42	8.4	1.49379	79.5031	0.130435	53.2225	2.6087	0.14 39.2	0.0328125	45.5
infected	male	5.6	3.32	1.51	188	0.71	10.3	2.19868	124.503	0.470199	56.6265	6.82119	0.14 41.3	0.0547872	37.6
infected	male	8.28	2.84	4.75	235	0.53	8.6	0.597895	49.4737	0.111579	82.7465	1.81053	0.13 35.5	0.0365957	43
infected	male	11.46	9.63	1.25	296	0.47	8.7	7.704	236.8	0.376	30.7373	6.96	0.14 36.4	0.0293919	48
infected	male	11.52	8.54	1.9	315	0.89	8.9	4.49474	165.789	0.468421	36.8852	4.68421	0.13 40.6	0.028254	38.6
infected	male	2.98	1.65	0.93	208	0.38	7.8	1.77419	223.656	0.408602	126.061	8.3871	0.14 37.8	0.0375	44
infected	female	6.08	3.31	2.16	298	0.48	8.8	1.53241	137.963	0.222222	90.0302	4.07407	0.14 33.2	0.0295302	43.2
infected	female	5.03	2.91	1.4	173	0.71	11.6	2.07857	123.571	0.507143	59.4502	8.28571	0.12 34.9	0.067052	46
infected	female	11.3	9.97	1.08	182	0.22	8.6	9.23148	168.519	0.203704	18.2548	7.96296	0.13 40.4	0.0472527	37.4
infected	female	5.37	2.74	2.13	240	0.23	8.3	1.28638	112.676	0.107981	87.5912	3.89671	0.13 35.4	0.0345833	41.4
infected	female	8.25	4.61	3	247	0.48	11.4	1.53667	82.3333	0.16	53.5792	3.8	0.13 41.4	0.0461538	34
infected	male	6.7	2.47	3.12	276	0.54	11.5	0.791667	88.4615	0.173077	111.741	3.6859	0.12 36.2	0.0416667	38
infected	male	9.99	3.07	6.01	183	0.55	20.8	0.510815	30.4493	0.0915141	59.6091	3.4609	0.13 41.9	0.113661	37.8
infected	male	18.51	11.65	4.69	394	2.07	7	2.48401	84.0085	0.441365	33.8197	1.49254	0.14 38.5	0.0177665	42
infected	female	5.58	4.12	0.76	380	0.69	10.1	5.42105	500	0.907895	92.233	13.2895	0.14 46.7	0.0265789	35.9
infected	female	5.57	2.35	1.64	419	1.44	10	1.43293	255.488	0.878049	178.298	6.09756	0.13 43.9	0.0238663	38.1
infected	female	21.49	18.78	1.77	476	0.46	9.7	10.6102	268.927	0.259887	25.3461	5.48023	0.13 38.2	0.0203782	38.5
infected	female	9.66	5.92	2.78	250	0.79	11.5	2.1295	89.9281	0.284173	42.2297	4.13669	0.12 38.4	0.046	42.2
infected	female	12.52	4.29	7.06	350	0.7	8.9	0.607649	49.5751	0.0991501	81.5851	1.26062	0.15 44.9	0.0254286	39
infected	female	7.75	3.48	3.37	333	0.5	8.9	1.03264	98.8131	0.148368	95.6897	2.64095	0.14 39.3	0.0267267	43
infected	female	12.18	6.81	4.11	346	0.98	7.5	1.65693	84.1849	0.238443	50.8076	1.82482	0.14 40.1	0.0216763	40.7
infected	female	13.99	6.72	6.04	395	0.59	7.1	1.11258	65.3974	0.0976821	58.7798	1.1755	0.14 37.7	0.0179747	46
infected	female	9.55	3.4	5.1	536	0.87	9.6	0.666667	105.098	0.170588	157.647	1.88235	0.16 54.5	0.0179104	42.6
infected	male	12.76	9.38	2.41	270	0.73	10.7	3.89212	112.033	0.302905	28.7846	4.43983	0.13 39.2	0.0396296	39.6
infected	male	6.64	2.9	2.88	275	0.36	10.4	1.00694	95.4861	0.125	94.8276	3.61111	0.14 38.5	0.0378182	40.4
infected	female	4.36	1.91	2.09	288	0.33	8.6	0.913876	137.799	0.157895	150.785	4.11483	0.14 38.7	0.0298611	42
infected	female	4.95	2.99	1.34	383	0.42	7.9	2.23134	285.821	0.313433	128.094	5.89552	0.12 34.1	0.0206266	38.8
infected	female	8.49	6.74	1.32	296	0.42	8	5.10606	224.242	0.318182	43.9169	6.06061	0.14 37.7	0.027027	37.4
infected	female	10.34	4.36	5.02	375	0.55	8.2	0.868526	74.7012	0.109562	86.0092	1.63347	0.15 39.2	0.0218667	35.7
infected	male	12.41	10.42	1	182	0.95	7.7	10.42	182	0.95	17.4664	7.7	0.14 39.8	0.0423077	36.1
infected	male	3.65	1.49	1.51	315	0.36	8.9	0.986755	208.609	0.238411	211.409	5.89404	0.13 33	0.028254	40.8
infected	male	3.11	1.41	1.27	165	0.24	13	1.11024	129.921	0.188976	117.021	10.2362	0.12 41.9	0.0787879	44.1
infected	female	3.51	2.98	0.27	475	0.23	7.8	11.037	1759.26	0.851852	159.396	28.8889	0.12 39.1	0.0164211	38
infected	male	6.47	4.14	1.62	227	0.6	10.1	2.55556	140.123	0.37037	54.8309	6.23457	0.12 35.3	0.0444934	40.4
infected	male	7.97	3.44	3.54	243	0.99	8.2	0.971751	68.6441	0.279661	70.6395	2.31638	0.13 36.9	0.0337449	34
infected	male	8.73	3.64	4.13	370	0.52	7.8	0.881356	89.5884	0.125908	101.648	1.88862	0.13 35.7	0.0210811	38.4
infected	male	10.87	6.48	2.92	328	1.45	7.8	2.21918	112.329	0.496575	50.6173	2.67123	0.14 38.7	0.0237805	35.5
infected	male	6.62	3.16	2.94	283	0.41	10	1.07483	96.2585	0.139456	89.557	3.40136	0.14 36.3	0.0353357	43.7
infected	female	8.41	6.75	0.63	180	1.02	8.2	10.7143	285.714	1.61905	26.6667	13.0159	0.16 45.5	0.0455556	34.3
infected	female	3.57	1.48	1.92	245	0.14	7.7	0.770833	127.604	0.0729167	165.541	4.01042	0.14 37	0.0314286	48
infected	female	6.63	3.08	2.82	391	0.31	7.6	1.0922	138.652	0.109929	126.948	2.69504	0.12 31	0.0194373	43.7
infected	male	5.19	3.69	1.01	135	0.43	8.2	3.65347	133.663	0.425743	36.5854	8.11881	0.14 41.5	0.0607407	41.7
infected	female	8.03	4.51	2.83	305	0.45	9.8	1.59364	107.774	0.159011	67.6275	3.4629	0.13 42.6	0.0321311	40.4
infected	female	6.62	3.44	2.52	247	0.48	8.57	1.36508	98.0159	0.190476	71.8023	3.40079	0.13 42.44	0.0346964	40.2
infected	male	9.08	5.15	3.42	448	0.48	7.8	1.50585	130.994	0.140351	86.9903	2.2807	0.12 32.2	0.0174107	46.3
infected	male	7.81	4.34	2.62	352	0.49	7.9	1.65649	134.351	0.187023	81.106	3.01527	0.14 36.5	0.0224432	42.7
infected	female	15.7	12.8	1.53	227	1.36	8.49	8.36601	148.366	0.888889	17.7344	5.54902	0.15 45.06	0.0374009	33.1
infected	male	7.56	5.04	1.92	300	0.44	8.4	2.625	156.25	0.229167	59.5238	4.375	0.13 34	0.028	43
infected	male	3.88	1.68	1.71	334	0.42	9.9	0.982456	195.322	0.245614	198.81	5.78947	0.13 40.7	0.0296407	44.5
infected	male	5.21	2.68	1.82	263	0.25	7.6	1.47253	144.505	0.137363	98.1343	4.17582	0.15 40.1	0.0288973	38.2
infected	male	6.59	4.53	1.47	280	0.32	7.7	3.08163	190.476	0.217687	61.8102	5.2381	0.15 39.6	0.0275	39.9
infected	male	4.53	2.36	1.83	390	0.31	9.8	1.28962	213.115	0.169399	165.254	5.35519	0.12 38.1	0.0251282	40.4
infected	male	7.29	6.41	0.19	430	0.68	8.3	33.7368	2263.16	3.57895	67.0827	43.6842	0.13 39.9	0.0193023	35.4
infected	male	5.28	2.97	1.72	233	0.45	8.25	1.72674	135.465	0.261628	78.4512	4.79651	0.13 36.75	0.0354077	41.6
infected	male	8.11	6.49	0.76	441	0.76	6.8	8.53947	580.263	1	67.9507	8.94737	0.12 35.2	0.0154195	41.1
infected	female	6.92	4.02	2.29	145	0.56	10.5	1.75546	63.3188	0.244541	36.0697	4.58515	0.12 35.4	0.0724138	36.1
infected	female	4.83	3.87	0.46	129	0.47	9.4	8.41304	280.435	1.02174	33.3333	20.4348	0.13 35.7	0.0728682	45
infected	female	4.8	2.3	1.9	323	0.5	7.12	1.21053	170	0.263158	140.435	3.74737	0.16	0.0220433	43.2
infected	female	6.92	4.1	2.2	151	0.6	8.22	1.86364	68.6364	0.272727	36.8293	3.73636	0.14	0.0544371	42.3
infected	female	5.72	3.45	1.52	257	0.48	9.7	2.26974	169.079	0.315789	74.4928	6.38158	0.14 41	0.0377432	37.9
infected	female	5.67	3.06	2.03	290	0.43	8	1.50739	142.857	0.211823	94.7712	3.94089	0.14 39.2	0.0275862	37.8
infected	male	5.22	3.37	1.31	372	0.32	8.1	2.57252	283.969	0.244275	110.386	6.18321	0.15 40.3	0.0217742	41.4
infected	male	10.27	7.6	2.06	384	0.44	8.9	3.68932	186.408	0.213592	50.5263	4.32039	0.13 34.4	0.0231771	40.2
infected	male	8.08	4.71	2.84	322	0.39	8.7	1.65845	113.38	0.137324	68.3652	3.06338	0.14 37.2	0.0270186	39
infected	male	6.36	3.18	2.71	258	0.39	9.4	1.17343	95.203	0.143911	81.1321	3.46863	0.12 40.9	0.0364341	39.5
infected	male	7.3	4.87	2.06	286	0.24	8.1	2.36408	138.835	0.116505	58.7269	3.93204	0.13 33.6	0.0283217	41.4
infected	male	7.83	5.26	1.71	322	0.13	7.9	3.07602	188.304	0.0760234	61.2167	4.61988	0.14 39.8	0.0245342	41.7
infected	female	6.21	5.42	0.68	220	0.11	8.6	7.97059	323.529	0.161765	40.5904	12.6471	0.12 35.8	0.0390909	36.8
infected	female	18.9	15.63	1.24	179	2.01	9.3	12.6048	144.355	1.62097	11.4523	7.5	0.15 45.9	0.0519553	38.9
infected	female	6.02	3.23	2.31	244	0.39	8.9	1.39827	105.628	0.168831	75.5418	3.85281	0.13 35.9	0.0364754	34.4
infected	female	2.02	0.7	1.11	215	0.18	8.2	0.630631	193.694	0.162162	307.143	7.38739	0.14 41.5	0.0381395	31.3
infected	female	6.97	5.28	1.33	222	0.33	8.2	3.96992	166.917	0.24812	42.0455	6.16541	0.14 44.7	0.0369369	29.7
infected	female	2.42	0.29	1.72	163	0.28	9.47	0.168605	94.7674	0.162791	562.069	5.50581	0.14 38.06	0.0580982	40
infected	male	2.08	1.63	0.27	139	0.18	8.5	6.03704	514.815	0.666667	85.2761	31.4815	0.16 49	0.0611511	33.3
infected	male	1.99	0.26	1.13	220	0.57	10.2	0.230088	194.69	0.504425	846.154	9.02655	0.16 54.4	0.0463636	42
infected	female	5.93	3.44	1.67	215	0.46	8.3	2.05988	128.743	0.275449	62.5	4.97006	0.15 40.4	0.0386047	37.9
infected	male	3.66	2.33	1.25	188	0.05	7.5	1.864	150.4	0.04	80.6867	6	0.13 33.1	0.0398936	38.4
infected	male	7.68	6.83	0.46	174	0.38	8.7	14.8478	378.261	0.826087	25.4758	18.913	0.13 35	0.05	37.1
infected	male	15.07	12.25	1.73	289	1.02	7.3	7.08092	167.052	0.589595	23.5918	4.21965	0.14 38.8	0.0252595	35.7
infected	male	5.32	1.96	2.44	407	0.52	8.2	0.803279	166.803	0.213115	207.653	3.36066	36.8	0.0201474
infected	male	9.73	2.57	6.03	417	0.84	7.9	0.426202	69.1542	0.139303	162.257	1.31012	38.2	0.0189448
infected	male	2.89	1.35	0.92	170	0.22	9.1	1.46739	184.783	0.23913	125.926	9.8913	32.2	0.0535294
infected	female	3.72	1.15	2.19	342	0.29	8.4	0.525114	156.164	0.13242	297.391	3.83562	0.15 41.4	0.0245614	42.3
infected	female	5.86	3.37	1.94	212	0.22	8	1.73711	109.278	0.113402	62.908	4.12371	0.14 30	0.0377358	41
infected	male	8.46	3.79	3.96	361	0.39	8.8	0.957071	91.1616	0.0984848	95.2507	2.22222	0.13 37.1	0.0243767	40.7
infected	female	8.5	2.01	5.7	331	0.58	8.9	0.352632	58.0702	0.101754	164.677	1.5614	0.13 39.4	0.0268882	35.2
infected	female	9.73	2.93	6.1	320	0.45	7.3	0.480328	52.459	0.0737705	109.215	1.19672	0.14 40.8	0.0228125	39.2
infected	female	10.3	3.22	6.34	282	0.42	7.5	0.507886	44.4795	0.0662461	87.5776	1.18297	0.14 39.3	0.0265957	40.1
infected	female	8.81	3.14	4.76	366	0.72	9.7	0.659664	76.8908	0.151261	116.561	2.03782	0.13 40.1	0.0265027	34.1
infected	male	3.07	1.12	1.53	362	0.28	10.1	0.732026	236.601	0.183007	323.214	6.60131	0.17 15.9	0.0279006	43.1
infected	male	4.8	1.59	2.73	279	0.24	8.7	0.582418	102.198	0.0879121	175.472	3.18681	0.16 43.8	0.0311828	42.9
infected	female	4.88	1.68	2.84	355	0.26	7.1	0.591549	125	0.0915493	211.31	2.5	0.13 35.3	0.02	34.7
infected	female	16.37	14.97	0.74	364	0.62	8.6	20.2297	491.892	0.837838	24.3153	11.6216	0.15 41.5	0.0236264	35.7
infected	female	6.23	3.36	2.33	317	0.45	8.3	1.44206	136.052	0.193133	94.3452	3.56223	0.15 40	0.026183	39.7
infected	female	11.94	4.86	6.08	448	0.57	8.8	0.799342	73.6842	0.09375	92.1811	1.44737	0.15 45.4	0.0196429	47.3
infected	male	5.28	4.28	0.74	338	0.21	7.7	5.78378	456.757	0.283784	78.972	10.4054	0.16 43.2	0.0227811	43
infected	female	10.77	5.5	4.69	332	0.52	9.3	1.17271	70.7889	0.110874	60.3636	1.98294	0.13 43.2	0.028012	43.7
infected	female	3.22	1.35	1.44	224	0.33	10.2	0.9375	155.556	0.229167	165.926	7.08333	0.13 42.5	0.0455357	42
infected	male	6.26	5.35	0.4	160	0.49	7.8	13.375	400	1.225	29.9065	19.5	0.14 39.3	0.04875	42.1
infected	female	10.68	8.23	1.61	266	0.59	9.1	5.1118	165.217	0.36646	32.3208	5.65217	0.15 41.3	0.0342105	38.7
infected	female	13.17	10.63	1.54	297	0.71	9	6.9026	192.857	0.461039	27.9398	5.84416	0.16 41.1	0.030303	36
infected	female	15.98	13.29	1.59	289	0.77	8.7	8.35849	181.761	0.484277	21.7457	5.4717	0.16 40	0.0301038	35.7
infected	male	2.21	0.79	1.21	212	0.15	7.6	0.652893	175.207	0.123967	268.354	6.28099	0.14 38	0.0358491	41.7
infected	female	5.24	3.14	1.67	280	0.28	7.7	1.88024	167.665	0.167665	89.172	4.61078	0.12 33.8	0.0275	42.8
infected	female	10.27	5.75	2.75	480	0.71	7.6	2.09091	174.545	0.258182	83.4783	2.76364	0.12 32.1	0.0158333	42
infected	male	10.25	8.34	1.51	323	0.37	8	5.52318	213.907	0.245033	38.729	5.29801	0.14 42.4	0.0247678	48
infected	female	1.92	0.92	0.67	224	0.33	8.3	1.37313	334.328	0.492537	243.478	12.3881	0.13 36.5	0.0370536	47.5
infected	male	14.21	7.61	5.57	255	0.74	9	1.36625	45.781	0.132855	33.5085	1.6158	0.13 33.2	0.0352941	36
infected	female	11.22	6.93	3.39	520	0.71	9.9	2.04425	153.392	0.20944	75.0361	2.92035	0.17 40.5	0.0190385	46.2
infected	female	11.99	10.74	0.67	225	0.56	8.2	16.0299	335.821	0.835821	20.9497	12.2388	0.15 47.2	0.0364444	42.5
infected	female	20.53	12.69	6.57	367	1.19	8.5	1.93151	55.86	0.181126	28.9204	1.29376	0.18 55.3	0.0231608	31
infected	female	6.8	3.49	2.98	227	0.29	7.24	1.17114	76.1745	0.0973154	65.043	2.42953	0.15 48.13	0.0318943	44.2
infected	female	5.12	2.36	2.41	228	0.22	8.39	0.979253	94.6058	0.0912863	96.6102	3.48133	0.14 45.94	0.0367982	43.2
infected	male	7.15	4.49	1.93	292	0.61	9.33	2.32642	151.295	0.316062	65.0334	4.8342	0.17 37.2	0.0319521	40.6
infected	male	2.57	1.05	1.1	254	0.34	7.77	0.954545	230.909	0.309091	241.905	7.06364	0.13 40.25	0.0305906	42.7
non-infected	female	9.18	4.89	3.22	315	0.84	8.5	1.51863	97.8261	0.26087	64.4172	2.63975	0.16	0.0269841	43.5
non-infected	female	8.98	3.78	4.05	294	0.93	8.9	0.933333	72.5926	0.22963	77.7778	2.19753	0.14 45.1	0.0302721	38
non-infected	female	8.7	4.91	2.79	218	0.83	8.6	1.75986	78.1362	0.297491	44.3992	3.08244	0.14 45.8	0.0394495	39.9
non-infected	male	7.17	3.56	3.24	270	0.25	10.5	1.09877	83.3333	0.0771605	75.8427	3.24074	0.14 38.8	0.0388889	47
non-infected	male	15.98	14.13	1.36	410	0.44	9	10.3897	301.471	0.323529	29.0163	6.61765	0.15 39.5	0.0219512	39.9
non-infected	male	10.24	6.86	2.5	352	0.64	8.8	2.744	140.8	0.256	51.312	3.52	0.16 39.7	0.025	44.9
non-infected	male	10.58	7.47	2.48	352	0.43	8.1	3.0121	141.935	0.173387	47.1218	3.26613	0.18 48.5	0.0230114	40.7
non-infected	male	13.88	11.19	1.7	496	0.87	8.6	6.58235	291.765	0.511765	44.3253	5.05882	0.16 41.6	0.0173387	37.5
non-infected	female	6.89	2	3.96	317	0.82	11.3	0.505051	80.0505	0.207071	158.5	2.85354	0.12 38.1	0.0356467	39.8
non-infected	female	6.37	3.73	2.22	216	0.35	11.7	1.68018	97.2973	0.157658	57.9088	5.27027	0.13 37.2	0.0541667	39.2
non-infected	female	5.7	2.18	3.19	244	0.3	10.6	0.683386	76.489	0.0940439	111.927	3.32288	0.13 39.8	0.0434426	45.8
non-infected	female	4.79	2.21	2.11	348	0.36	10.3	1.04739	164.929	0.170616	157.466	4.88152	0.15 41.1	0.0295977	46.3
non-infected	female	5.73	2.59	2.62	321	0.39	9.7	0.98855	122.519	0.148855	123.938	3.70229	0.14 42.5	0.0302181	41.7
non-infected	female	4.67	2.17	1.74	272	0.63	11.4	1.24713	156.322	0.362069	125.346	6.55172	0.17 41.30	0.0419118	40.5
non-infected	male	6.96	3.61	2.42	269	0.52	10.4	1.49174	111.157	0.214876	74.5152	4.29752		0.0386617	42.3
non-infected	male	6.62	3.82	2.21	257	0.42	9.8	1.72851	116.29	0.190045	67.2775	4.43439	0.13 36.2	0.0381323	44.3
non-infected	male	5.34	2.42	2.49	339	0.28		0.971888	136.145	0.11245	140.083	0	0.18 35.7	0	46.8
non-infected	male	7.9	3.12	3.88	389	0.53	9.3	0.804124	100.258	0.136598	124.679	2.39691	0.14 41.4	0.0239075	47.9
non-infected	male	8.66	2.58	5.22	387	0.52	10.4	0.494253	74.1379	0.0996169	150	1.99234	0.15 43.8	0.0268734	42.7
non-infected	male	10.86	3.58	5.77	325	0.76	9.4	0.620451	56.3258	0.131716	90.7821	1.62912	0.13 39.1	0.0289231	41.3
non-infected	male	4.13	2.82	0.76	213	0.42	10.4	3.71053	280.263	0.552632	75.5319	13.6842	0.12 37.7	0.0488263	47.1
non-infected	female	5.37	1.86	2.84	382	0.51	9.7	0.65493	134.507	0.179577	205.376	3.41549	0.13 38.8	0.0253927	41.8
non-infected	female	5.54	2.66	2.35	352	0.4	9.7	1.13191	149.787	0.170213	132.331	4.12766	0.13 39.6	0.0275568	43.1
non-infected	male	9.34	5.56	2.75	438	0.58	9.4	2.02182	159.273	0.210909	78.777	3.41818	0.13 42.1	0.0214612	44.8
non-infected	male	4.68	2.18	1.83	331	0.46	9.1	1.19126	180.874	0.251366	151.835	4.97268	0.16 39.8	0.0274924	44.5
non-infected	female	6.68	4.67	1.51	243	0.39	11.1	3.09272	160.927	0.258278	52.0343	7.35099	0.14 44.70	0.045679	40.3
non-infected	male	4.97	2.13	2.1	255	0.62	9.1	1.01429	121.429	0.295238	119.718	4.33333	0.14 40.2	0.0356863	40
non-infected	female	6	2.56	3.09	326	0.3	8.4	0.828479	105.502	0.0970874	127.344	2.71845	0.12 34.8	0.0257669	44.8
non-infected	male	4.45	2.56	1.46	266	0.29	9	1.75342	182.192	0.19863	103.906	6.16438	0.13 35.1	0.0338346	45.2
non-infected	male	5.07	3.15	1.53	202	0.3	7.9	2.05882	132.026	0.196078	64.127	5.1634	0.13 35.1	0.0391089	48
non-infected	female	9.05	5.87	2.22	252	0.68	9.6	2.64414	113.514	0.306306	42.9302	4.32432	0.14 52.1	0.0380952	45.2
non-infected	female	5.87	3.48	1.76	317	0.51	8.4	1.97727	180.114	0.289773	91.092	4.77273	0.14 45.7	0.0264984	40.8
non-infected	male	6.66	2.63	3.08	306	0.7	10.4	0.853896	99.3506	0.227273	116.35	3.37662	0.15 43.2	0.0339869	39.9
non-infected	male	7.72	3.36	3.63	263	0.58	10	0.92562	72.4518	0.15978	78.2738	2.75482	0.16 45.1	0.0380228	37.9
non-infected	male	6.23	2.37	3.1	213	0.59	7.8	0.764516	68.7097	0.190323	89.8734	2.51613	0.14 43.31	0.0366197	43.8
non-infected	female	4.81	3.06	1.33	270	0.33	7.68	2.30075	203.008	0.24812	88.2353	5.77444	0.16 52.06	0.0284444	44.8
non-infected	female	4.05	2.61	1.05	242	0.31	8.4	2.48571	230.476	0.295238	92.7203	8	0.12 35.6	0.0347107	43
non-infected	female	7.52	4.83	2.15	389	0.45	9.4	2.24651	180.93	0.209302	80.5383	4.37209	0.13 40.3	0.0241645	38
non-infected	female	5.8	2.16	3.18	323	0.24	7.3	0.679245	101.572	0.0754717	149.537	2.2956	0.12 33	0.0226006	38
non-infected	male	4.57	2.63	1.54	208	0.37	11.6	1.70779	135.065	0.24026	79.0875	7.53247	0.13 40.5	0.0557692	45.3
non-infected	male	6.34	3.02	2.89	275	0.33	10.1	1.04498	95.1557	0.114187	91.0596	3.49481	0.14 46.3	0.0367273	45.4
non-infected	male	6.03	3.14	2.1	204	0.52	10.3	1.49524	97.1429	0.247619	64.9682	4.90476	0.14 44.6	0.0504902	48.2
non-infected	female	5.28	3.33	1.51	306	0.31	10.3	2.2053	202.649	0.205298	91.8919	6.82119	0.15 46.2	0.0336601	44.1
non-infected	female	6.45	4.07	1.41	307	0.55	10.1	2.88652	217.73	0.390071	75.43	7.16312	0.14 40.3	0.032899	42.7
non-infected	female	6.95	3.82	2.35	306	0.66	9.6	1.62553	130.213	0.280851	80.1047	4.08511	0.14 41.9	0.0313725	41.4
non-infected	male	7.03	3.42	2.83	316	0.6	9.4	1.20848	111.661	0.212014	92.3977	3.32155	0.14 42.1	0.0297468	41.3
non-infected	male	6.09	1.46	3.67	259	0.56	10.7	0.39782	70.5722	0.152589	177.397	2.91553	0.13 40.6	0.0413127	42.4
non-infected	female	5.96	2.68	2.65	322	0.44	9.4	1.01132	121.509	0.166038	120.149	3.54717	0.12 40.8	0.0291925	46.2
non-infected	male	5.8	1.98	3.02	251	0.48	10.5	0.655629	83.1126	0.15894	126.768	3.47682	0.13 39.2	0.0418327	38.1
non-infected	male	6.7	4.46	1.57	234	0.6	10.4	2.84076	149.045	0.382166	52.4664	6.6242	0.12 40.7	0.0444444	42.8
non-infected	male	6.34	4.21	1.8	338	0.32	11.8	2.33889	187.778	0.177778	80.285	6.55556	0.15 42.9	0.0349112	48
non-infected	male	8.13	5.43	1.93	284	0.39	9.8	2.81347	147.15	0.202073	52.302	5.07772	0.14 41.1	0.034507	47.1
non-infected	female	5.22	2.56	1.93	394	0.56	10	1.32642	204.145	0.290155	153.906	5.18135	0.13 38.1	0.0253807	40.9
non-infected	female	6.62	3.87	2.15	328	0.51	8.6	1.8	152.558	0.237209	84.7545	4	0.14 34.5	0.0262195	42.3
non-infected	female	4.89	1.22	3.04	312	0.14	11.8	0.401316	102.632	0.0460526	255.738	3.88158	0.14 38.1	0.0378205	38.9
non-infected	female	5.65	2.52	2.93	295	0.15	8.4	0.860068	100.683	0.0511945	117.063	2.86689	0.12 39.2	0.0284746	39.7
non-infected	female	5.89	2.66	2.91	319	0.17	9	0.914089	109.622	0.0584192	119.925	3.09278	0.12 41.8	0.0282132	40.4
non-infected	female	5.16	2.51	2.41	254	0.22	9.2	1.04149	105.394	0.0912863	101.195	3.81743	0.12 38	0.0362205	39.5
non-infected	female	4	1.8	1.9	233	0.2	233	0.947368	122.632	0.105263	129.444	122.632	0.19 49.8	1	35.2
non-infected	female	6.26	3.26	2.39	278	0.46	12	1.36402	116.318	0.192469	85.2761	5.02092	0.14 40.9	0.0431655	34.1
non-infected	female	5.9	2.52	2.88	231	0.36	11.1	0.875	80.2083	0.125	91.6667	3.85417	0.12 39.00	0.0480519	37.4
non-infected	male	6.23	3.54	1.84	344	0.48	8.9	1.92391	186.957	0.26087	97.1751	4.83696	0.14 40.7	0.0258721	37.8
non-infected	male	5.41	2.97	1.93	277	0.27	11	1.53886	143.523	0.139896	93.266	5.69948	0.13 36.7	0.0397112	39.1
non-infected	male	6.37	2.15	3.59	195	0.31	12.5	0.598886	54.3175	0.086351	90.6977	3.48189	0.13 40.9	0.0641026	37.5
non-infected	female	4.83	3.55	0.69	449	0.58	10.3	5.14493	650.725	0.84058	126.479	14.9275	0.14 47.1	0.0229399	38.8
non-infected	female	10.02	6.34	2.5	344	0.95	10.3	2.536	137.6	0.38	54.2587	4.12	0.13 39.8	0.0299419	40.3
non-infected	female	4.35	2.04	1.97	189	0.21	13.5	1.03553	95.9391	0.106599	92.6471	6.85279	0.14 42.1	0.0714286	45.3
non-infected	male	4.16	1.88	1.68	228	0.56	9.1	1.11905	135.714	0.333333	121.277	5.41667	0.15 44.4	0.0399123	41.1
non-infected	male	7.37	4.44	2.22	174	0.65	8.7	2	78.3784	0.292793	39.1892	3.91892	0.15 47.8	0.05
non-infected	male	6.45	4.16	1.71	250	0.52	8.8	2.43275	146.199	0.304094	60.0962	5.1462	0.14 46.3	0.0352	41
non-infected	male	6.56	3.69	2.27	264	0.54	8.6	1.62555	116.3	0.237885	71.5447	3.78855	0.13 41.8	0.0325758	45.4
non-infected	male	5.06	2.91	1.6	286	0.49	9.5	1.81875	178.75	0.30625	98.2818	5.9375		0.0332168	44.9
non-infected	male	5.38	3.24	1.66	326	0.44	8.7	1.95181	196.386	0.26506	100.617	5.24096	0.13 40.1	0.0266871	45.9
non-infected	male	4.94	2.74	1.69	250	0.47	9.3	1.6213	147.929	0.278107	91.2409	5.50296	0.15 47.5	0.0372	41.2
non-infected	female	9.11	5.81	2.33	302	0.52	9.9	2.49356	129.614	0.223176	51.9793	4.24893	0.14 40.6	0.0327815	37
non-infected	male	7.3	4.02	2.43	258	0.56	11.7	1.65432	106.173	0.230453	64.1791	4.81481	0.13 42.2	0.0453488	40.2
non-infected	male	7.83	4.08	3.08	278	0.36	11.5	1.32468	90.2597	0.116883	68.1373	3.73377	0.12 37.9	0.0413669	37.5
non-infected	male	8	6.56	1.22	294	0.15	10.6	5.37705	240.984	0.122951	44.8171	8.68852	0.13 36.6	0.0360544	45
non-infected	female	5.92	4.36	1.36	266	0.17	8.8	3.20588	195.588	0.125	61.0092	6.47059	0.17 46.1	0.0330827	43.5
non-infected	male	3.44	1.27	1.43	315	0.64	10.1	0.888112	220.28	0.447552	248.031	7.06294	0.13 41.4	0.0320635	51
non-infected	male	5.54	2.94	1.77	381	0.56	7.23	1.66102	215.254	0.316384	129.592	4.08475	0.15 44.19	0.0189764	42
non-infected	male	3.07	1.34	1.2	272	0.41	8.9	1.11667	226.667	0.341667	202.985	7.41667	0.15 45.1	0.0327206	46
non-infected	female	5.95	3.87	1.36	345	0.6	9.9	2.84559	253.676	0.441176	89.1473	7.27941	0.12 42.6	0.0286957	40.3
non-infected	female	6.74	3.39	2.89	282	0.37	9.6	1.17301	97.5779	0.128028	83.1858	3.3218	0.12 38.5	0.0340426	40.3
non-infected	male	5.35	1.5	3.25	298	0.46	8.1	0.461538	91.6923	0.141538	198.667	2.49231	0.14 38.6	0.0271812	40.9
non-infected	male	8.88	4.17	3.76	316	0.76	10.1	1.10904	84.0426	0.202128	75.7794	2.68617	0.14 45.6	0.031962	45.1
non-infected	female	3.91	2.39	1.15	246	0.27	9.2	2.07826	213.913	0.234783	102.929	8	0.14 40.7	0.0373984	37.1
non-infected	female	6.93	3.51	2.76	305	0.39	9.7	1.27174	110.507	0.141304	86.8946	3.51449	0.13 38.6	0.0318033	44.6
non-infected	male	5.8	5.41	0.29	189	0.1	7.9	18.6552	651.724	0.344828	34.9353	27.2414	0.17 50.7	0.0417989	38.1
non-infected	female	5.26	2.31	2.44	307	0.23	9.7	0.946721	125.82	0.0942623	132.9	3.97541	0.13 40.5	0.0315961	40.8
non-infected	female	6.34	3.08	2.51	265	0.55	10.5	1.22709	105.578	0.219124	86.039	4.18327	0.13 41.7	0.0396226	39.8
non-infected	male	8.3	4	3.29	387	0.67	9.2	1.21581	117.629	0.203647	96.75	2.79635	0.12 38.7	0.0237726	41.6
non-infected	male	4.58	2.1	1.82	230	0.32	9.9	1.15385	126.374	0.175824	109.524	5.43956	0.13 37.7	0.0430435	41.5
non-infected	male	6.72	3.34	2.77	264	0.55	9.9	1.20578	95.3069	0.198556	79.0419	3.57401	0.14 42.4	0.0375	38.9
non-infected	male	4.4	2.1	1.97	220	0.18	9.1	1.06599	111.675	0.0913706	104.762	4.61929	0.13 40.7	0.0413636	39.7
non-infected	male	3.74	1.67	1.59	222	0.43	8.1	1.05031	139.623	0.27044	132.934	5.09434	0.12 36	0.0364865	40.2
non-infected	female	4.82	1.35	2.98	264	0.29	8.8	0.45302	88.5906	0.0973154	195.556	2.95302	0.12 35.4	0.0333333	39.7
non-infected	female	4.96	3.12	1.31	337	0.42	9.2	2.38168	257.252	0.320611	108.013	7.0229	0.12 39.3	0.0272997	39.8
non-infected	female	6.4	3.21	2.47	364	0.6	9	1.2996	147.368	0.242915	113.396	3.64372	0.12 36.9	0.0247253	46
non-infected	female	6.32	3.22	2.46	296	0.38	9.5	1.30894	120.325	0.154472	91.9255	3.86179	0.12 36.9	0.0320946	43.7
non-infected	female	5.78	3.48	1.79	242	0.35	7.54	1.94413	135.196	0.195531	69.5402	4.21229	0.13 37.63	0.031157	45.6
non-infected	male	6.6	3.78	1.9	342	0.6	9	1.98947	180	0.315789	90.4762	4.73684	0.13 39.6	0.0263158	47.6
non-infected	female	10.26	6	3.73	242	0.39	11.2	1.60858	64.8794	0.104558	40.3333	3.00268	0.12 36	0.046281	40
non-infected	female	8.02	4.84	2.81	203	0.31	11.1	1.72242	72.242	0.11032	41.9421	3.95018	0.11 36	0.0546798	43.8
non-infected	male	5.62	3.52	1.61	271	0.41	9.2	2.18634	168.323	0.254658	76.9886	5.71429	0.13 40.9	0.0339483	44.9
non-infected	female	5.25	2.43	2.1	320	0.59	12.2	1.15714	152.381	0.280952	131.687	5.80952	0.15 43.4	0.038125	44.2
non-infected	female	6.49	1.78	3.72	243	0.88	9.7	0.478495	65.3226	0.236559	136.517	2.60753	0.16 43.2	0.0399177	40.3
non-infected	female	7.09	4.18	1.98	191	0.74	11	2.11111	96.4646	0.373737	45.6938	5.55556	0.13 42.5	0.0575916	40.5
non-infected	female	8.04	3.64	3.55	220	0.74	9.8	1.02535	61.9718	0.208451	60.4396	2.76056	0.13 41.2	0.0445455	38.2
non-infected	female	8.18	2.8	4.25	347	0.73	10.7	0.658824	81.6471	0.171765	123.929	2.51765	0.12 39.4	0.0308357	42.4
non-infected	male	4.72	2.28	1.91	229	0.35	9.7	1.19372	119.895	0.183246	100.439	5.07853	0.13 38.7	0.0423581	38.8
non-infected	male	7.07	3.59	2.82	276	0.38	10.4	1.27305	97.8723	0.134752	76.8802	3.68794	0.13 38.5	0.0376812	41.4
non-infected	male	8.61	5.34	2.46	260	0.42	8	2.17073	105.691	0.170732	48.6891	3.25203	0.14 40.69	0.0307692	42
non-infected	female	4.41	2.02	1.71	264	0.45	9.8	1.18129	154.386	0.263158	130.693	5.73099	0.14 41.7	0.0371212	38.1
non-infected	female	4.93	2.13	1.97	234	0.43	9.8	1.08122	118.782	0.218274	109.859	4.97462	0.12 37	0.0418803	39.8
non-infected	male	5.01	2.17	2.16	286	0.41	11.4	1.00463	132.407	0.189815	131.797	5.27778	0.13 36.1	0.0398601	40.8
non-infected	male	7.73	4.85	2.06	297	0.54	10.7	2.35437	144.175	0.262136	61.2371	5.19417	0.13 35.8	0.0360269	43.7
non-infected	female	6.54	1.3	4.79	223	0.33	8.97	0.271399	46.5553	0.0688935	171.538	1.87265	43.31	0.0402242	45
non-infected	male	9.82	4.24	4.18	291	0.99	11.2	1.01435	69.6172	0.236842	68.6321	2.67943	46.1	0.038488	44.3
non-infected	male	4.72	3.25	0.85	238	0.49	10.2	3.82353	280	0.576471	73.2308	12	0.14	0.0428571	42.2
non-infected	female	6.46	4.12	1.91	216	0.3	7.5	2.15707	113.089	0.157068	52.4272	3.9267	0.18 56.44	0.0347222	44.4
non-infected	female	3.24	1.59	1.21	296	0.3	9.5	1.31405	244.628	0.247934	186.164	7.85124	0.12 35.7	0.0320946	42.6
non-infected	female	4.95	3.14	1.16	349	0.58	9.6	2.7069	300.862	0.5	111.146	8.27586	0.15 50.8	0.0275072	49.4
non-infected	male	5.27	3.36	1.39	257	0.45	9.5	2.41727	184.892	0.323741	76.4881	6.83453	0.17 51.7	0.036965	45.4
non-infected	male	6.41	3.38	2.5	85	0.39		1.352	34	0.156	25.1479	0	0.14 39.4	0	36.8
non-infected	male	10.14	6.04	3.17	261	0.76	8.7	1.90536	82.3344	0.239748	43.2119	2.74448	0.14 48.5	0.0333333	41.6
non-infected	male	4.42	2.5	1.21	224	0.48	7.58	2.06612	185.124	0.396694	89.6	6.26446	0.14 41.56	0.0338393	44.2
non-infected	female	4.75	2.4	1.57	333	0.47	8.7	1.52866	212.102	0.299363	138.75	5.5414	0.12 34.9	0.0261261	41.1
non-infected	female	6.23	3.06	2.62	327	0.44	8.8	1.16794	124.809	0.167939	106.863	3.35878	0.12 37.5	0.0269113	44.8
non-infected	male	3.26	1.57	1.25	284	0.34	7.87	1.256	227.2	0.272	180.892	6.296	0.14 40.25	0.0277113	46.9
non-infected	male	6.58	4.16	1.94	278	0.4	9.23	2.14433	143.299	0.206186	66.8269	4.75773	0.13 40.69	0.0332014	44.5
non-infected	female	6.32	4.34	1.68	241	0.27	10.2	2.58333	143.452	0.160714	55.53	6.07143	0.14 49.4	0.0423237	40
non-infected	female	3.02	1.71	1.1	239	0.16	9.8	1.55455	217.273	0.145455	139.766	8.90909	0.13 43.5	0.0410042	37.8
				2.22104
