# Supplementary figures and images for: Development and validation of a simple clinical nomogram for predicting infectious diseases in pediatric kidney transplantation recipients: a retrospective study
Source: PeerJ journal article supplement (doi:10.7717/peerj.18454), 2024-11-21

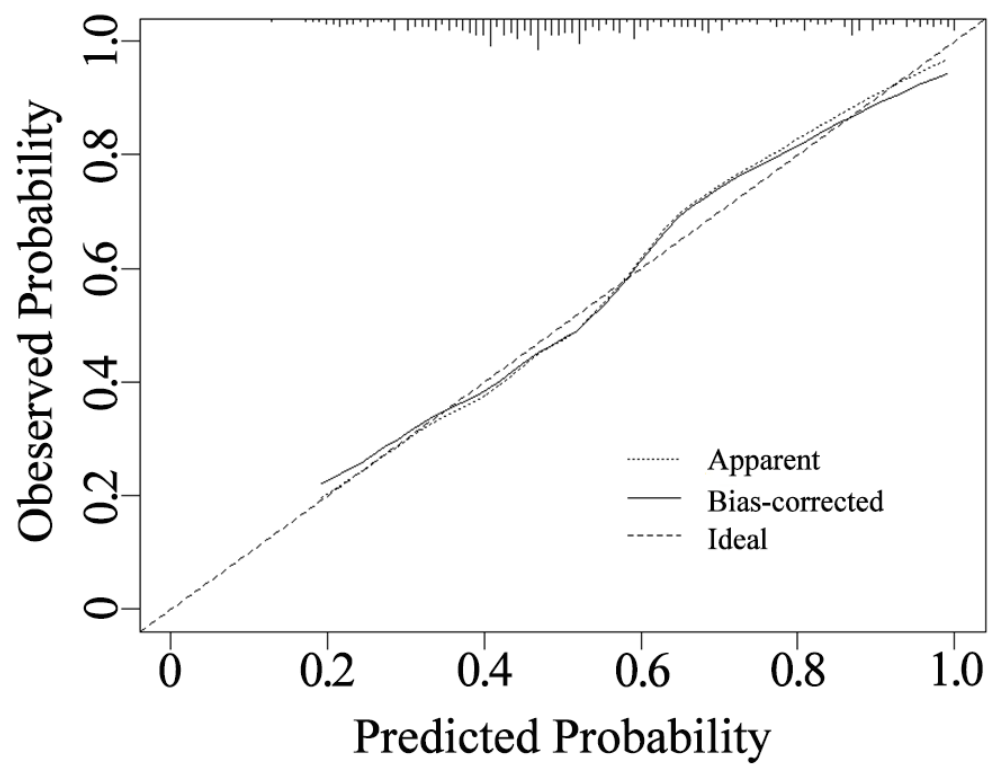

B = 1000 repetitions, boot

Mean absolute error = 0.019 n=297

Supplement: Figures_and_data.zip [file Figures_and_data.zip]

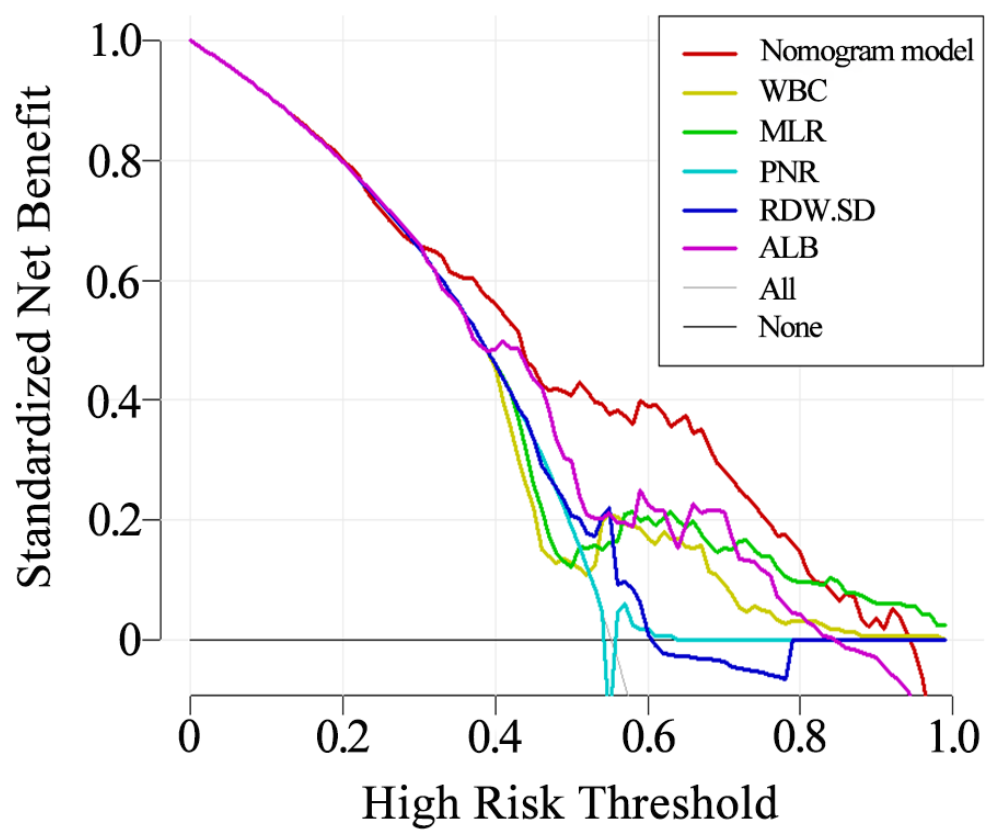

Supplement: Figures_and_data.zip [file Figures_and_data.zip]

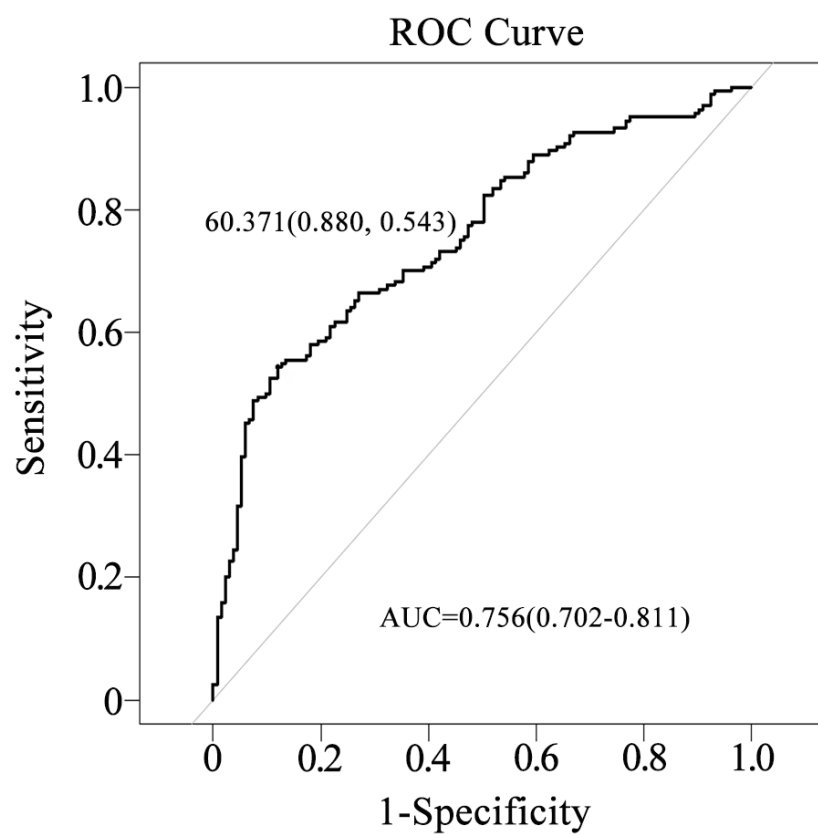

Supplement: Figures_and_data.zip [file Figures_and_data.zip]

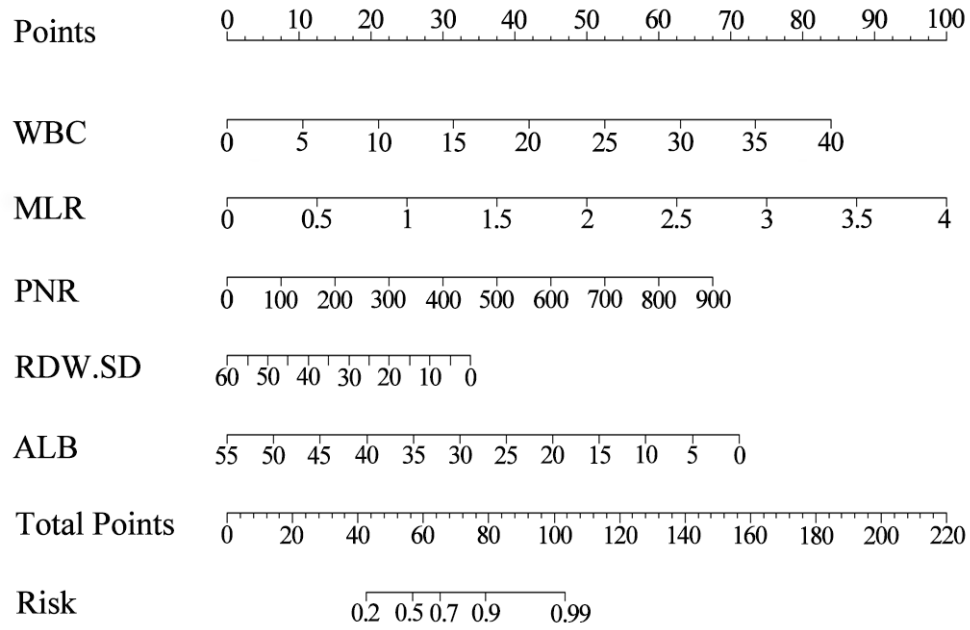

Supplement: Figures_and_data.zip [file Figures_and_data.zip]
